# Supplementary material
Source: publisher figshare collection journal article supplement (https://gsapubs.figshare.com/ndownloader/files/36503292)
Supplement: Supplementary file 1 [file 36503292]

## Sheet: major and trace elements
Table S3. Major and trace element data for representative samples of these mafic to intermediate intrusive rocks from the Kaiyuan region of northern Liaoning, North China
Sample	KY13-11-2	KY13-11-3	KY13-11-4	KY12-1-2	KY12-1-4	KY12-1-6	KY12-1-7	KY17-3-1	KY12-2-1	KY12-2-4	KY12-2-2	KY12-2-3	KY17-6-1	KY17-6-2	KY17-6-7	FX12-30-1	FX12-30-2	FX12-30-6	FX12-30-7	KY17-1-1	KY17-7-1	KY12-8-1	KY12-8-3	KY12-9-4	KY12-9-1	KY12-4-1	KY12-4-3
Pluton	Diaopitun (DPT)			Bakeshu (BKS)							Bakeshu (BKS)					Qinghezhen (QHZ)					Shahe-Valley (SHV)
Longitude	E 124°22′10″			E 124°37′12″							E 124°32′22″					E 124°13′05″					E 124°19′41″					E 124°08′40″
Latitude	N 42°32′52″			N 42°22′54″							N 42°27′12″					N 42°36′06″					N 42°21′04″					N 42°24′49″
SiO2	47.78	57.73	55.62	41.6	42.15	41.37	41.65	46.54	49.14	48.01	47.99	49.44	49.89		52.642	58.39	60.15	57.66	57.53	58.49	53.13	53.87	55.68	57.4	67.14	52.18	52.16
TiO2	1.2261	0.8083	0.9456	1.69	1.69	1.92	1.73	1.775	1.21	1.18	1.64	1.76	1.9161		1.2753	1.21	0.71	1.34	1.23	1.2315	0.5441	0.95	1.03	1	0.6	0.79	0.83
Al2O3	16.58	17.33	17.14	18.38	20.14	15.82	19.98	17.82	12.86	14.4	17.95	18.6	18.27		18.69	15.49	15.54	15.07	15.83	15.83	9.53	15.24	15.85	16.29	15.27	17.91	17.74
Fe2O3T	10.81	6.52	7.88	14.64	13.07	14.46	13.24	12.43	13.44	13.2	10.96	10.12	9.73		8.746	6.2	5.41	6.37	6.28	6.09	9.89	7.13	7	6.93	3.76	6.48	6.44
MnO	0.1556	0.0627	0.1168	0.2	0.13	0.22	0.13	0.14	0.21	0.19	0.14	0.12	0.12		0.12	0.09	0.07	0.07	0.08	0.09	0.17	0.12	0.1	0.11	0.05	0.15	0.11
MgO	6.19	2.84	3.95	7.08	6.5	10.23	6.99	5.95	7.52	6.36	4.82	4.21	4.32		3.68	4.91	5.64	4.13	4.12	4.59	16.5	5.68	6.01	5.78	2.1	5.71	5.76
CaO	7.17	4.06	6.15	11.74	12.02	11.76	12.28	10.16	10.33	10.43	9.75	7.35	8.11		7.27	4.64	4.14	4.45	4.82	4.96	6.99	8.89	7.64	6.86	2.76	8.73	9.28
Na2O	3.21	3.42	3.99	2.39	2.4	2.22	2.26	3.2328	2.18	2.3	3.79	4.15	4.3229		4.7086	3.98	3.86	3.38	3.85	4.158	1.6634	3.4	3.6	3.88	4.03	3.5	3.6
K2O	1.52	2.8	1.89	0.42	0.53	0.63	0.34	0.4564	1.03	1.28	0.87	2.19	2.1016		1.494	2.64	2.78	3.03	2.28	2.6279	0.3219	1.47	1.57	1.9	3.37	1.31	1.34
P2O5	0.3269	0.2562	0.2964	0.26	0.28	0.13	0.19	0.2406	0.1	0.1	0.72	0.57	0.5429		0.3681	0.31	0.2	0.37	0.32	0.3277	0.0639	0.2	0.18	0.22	0.14	0.13	0.15
LOI	5.47	4.6	2.1	1.62	0.94	0.88	0.68	0.56	1.54	1.56	1.08	0.7	0.45954		0.37962	2.34	1.9	5.13	4.12	1.53908	0.699301	3.18	1.7	0.36	1.24	3.06	2.66
Total	100.44	100.43	100.08	100.02	99.85	99.64	98.908	99.3048	99.56	99.01	98.789	98.753	99.783		99.3736	98.05	100.4	101	100.46	99.9342	99.5026	100.13	100.36	100.537	100.46	99.95	100.07
MgO#	57.164	50.3753	53.879	52.9864	53.6825	62.2464	55.1645	52.7313	56.5967	52.8941	50.6151	49.2259	50.853		49.51	64.8581	70.8419	60.175	60.4575	63.7219	79.5421	64.9928	66.6767	66.0299	56.5521	67.2515	67.579
Li	42.2993	19.9923	17.1225	5.68982	10.8461	4.13213	9.16565	5.56			7.519	20.0541	12.9	11.5		24.1833	46.5351	52.1811	43.8872	21.2	6.11	13.9636	9.91696	9.06306	6.88984	17.1091	9.66353
Be	1.51283	1.49612	1.55748	0.594644	0.463519	0.673706	0.466457	0.788			1.54271	1.9201	1.45	1.92		2.08619	2.6792	3.01531	2.47305	1.86	0.461	1.21319	1.27677	1.48287	1.88111	1.0367	1.19982
Sc	26.9576	12.5877	16.1642	31.231	29.4048	48.8022	31.2824	29.8			18.7702	13.4466	11	14.5		14.7663	14.0858	14.877	15.6028	12	35	19.6544	20.3529	18.2733	7.51985	26.082	31.2423
V	209.73	109.85	159.201	299.097	330.362	379.64	328.748	354			191.627	172.867	204	196		124.35	122.36	131.285	125.515	114	129	125.765	131.655	127.298	56.7965	126.317	144.533
Cr	217.909	46.8332	65.0101	25.8853	18.4827	253.403	26.2292	46.7			11.6521	11.8866	26.6	18		169.446	143.871	154.536	168.859	167	1204	259.814	272.168	183.846	62.2547	10.9161	18.1076
Co	32.3157	17.1219	21.0455	43.8491	44.4809	53.1861	44.5657	41.9			30.4064	26.6503	30	26.4		24.2961	21.5936	23.7321	23.9771	24	74.6	35.8622	34.819	29.0277	10.3004	27.8673	26.9903
Ni	55.4616	16.5931	22.2276	20.5991	20.7391	67.973	23.3829	20.2			15.7137	16.297	17.1	11.8		113.998	97.1559	107.717	113.835	91.1	577	143.981	144.216	119.885	45.6955	21.3572	24.2408
Cu	49.0887	3.4072	23.4786	44.7437	39.6271	37.7619	41.5207	67.5			108.846	12.6561	44.7	32.6		39.9625	42.3902	51.0263	42.5789	30.3	93.6	24.5125	35.9373	37.2461	12.3887	7.1275	25.2071
Zn	132.255	78.5563	90.389	128.664	97.3476	118.241	90.0188	112			91.2775	119.507	128	109		62.2558	58.0566	64.1311	65.0701	64.5	98.5	62.8394	59.6706	67.0783	49.4542	74.2626	54.9135
Ga	23.5752	20.4318	21.519	22.0338	21.3901	19.3042	20.835	23.1			22.6326	24.9102	25.6	25.2		19.622	18.5928	18.4594	20.0512	19.2	10.8	16.4028	17.2637	18.624	18.3375	17.4014	17.1192
Rb	32.4942	98.9936	45.8722	2.57444	10.0714	3.12786	2.91068	2.64			11.0159	71.4503	66.6	36.6		77.5853	109.86	128.617	72.3355	68.1	3.76	34.9881	38.8965	50.8405	79.6897	39.869	32.2774
Sr	714.329	356.999	777.098	881.494	908.509	528.166	861.458	765			1030.21	1175.22	957	997		675.395	511.548	416.433	654.204	749	458	520.461	531.503	599.117	476.878	702.298	693.55
Y	39.2512	16.7976	21.1231	31.5534	19.2016	30.3079	17.9115	26.4			30.4502	24.7342	24.8	19		20.385	20.5298	19.3501	20.7331	20.4	11.5	17.7317	18.2809	20.1463	11.752	17.7835	18.2498
Zr	125.63	175.373	153.876	53.9002	32.6754	71.3838	29.9957	44.4			130.906	185.016	212	146		120.333	141.127	114.269	129.479	161	43.4	101.261	130.835	130.077	179.577	92.4169	101.268
Nb	13.3931	8.22371	9.88217	5.45373	3.03418	5.44572	2.73662	7.2			13.7699	18.0098	18.4	16.8		7.60367	8.10225	8.24623	7.73656	8.27	0.732	3.74578	4.36198	4.88875	8.76955	2.41107	2.41951
Mo				0.373554	0.14948	0.100336	0.0932151	0.141			1.03328	0.739427	0.832	0.678		0.6086	1.38549	1.49461	0.575696	0.969	0.194	0.595146	0.712872	0.838064	0.200151	0.267653	0.0955455
Sn	2.51534	1.32868	1.6794	1.33091	0.877699	1.41326	0.899129				1.7701	2.04536				2.17306	2.05325	2.15348	2.05507			1.13698	1.18811	1.2632	1.56865	8.96937	1.1574
Cs	0.891694	11.048	2.19501	0.540811	1.31168	0.250924	0.508029	0.135			0.398099	1.49942	1.01	0.686		3.59742	12.2238	15.467	4.92242	3.2	0.456	2.95052	2.9383	2.10599	0.51844	1.15648	1.56799
Ba	800.223	517.927	869.564	117.897	129.538	146.052	108.977	397			290.093	731.826	712	597		645.395	537.75	492.332	571.174	649	186	376.137	393.482	525.635	861.364	350.014	393.927
La	40.1171	27.4628	31.3701	10.5778	7.20696	8.72752	5.57267	16.1			33.3062	36.6713	37.9	39.1		25.6385	25.378	26.3587	26.4263	26.5	5.1	13.736	14.4875	19.4885	32.0952	11.4524	11.3178
Ce	91.6969	55.9536	65.7885	31.8265	19.0334	27.0673	15.1724	38.5			73.9869	80.921	78.8	68.3		54.5323	54.7013	57.3352	55.194	54.4	11.9	29.4292	30.5417	39.1279	54.2253	22.5528	23.7586
Pr	11.9266	6.53241	7.74126	5.23602	2.98906	4.48368	2.53984	6.11			10.2615	10.4083	10.6	8.26		6.50155	6.67631	6.82653	6.55878	6.62	1.79	3.68578	3.79176	4.94022	5.75925	3.01021	3.15409
Nd	48.8456	24.8535	30.2829	27.2703	16.1011	23.3372	13.8758	31.2			46.3979	44.7995	47.1	33.8		26.1272	26.6454	27.6505	26.3333	27.6	8.92	16.8448	16.6425	20.9833	20.9157	13.6216	13.9432
Sm	10.0083	4.6201	5.85062	7.13505	4.29829	6.42472	4.11163	6.92			10.1417	8.863	9.22	6.04		5.14899	5.30859	5.406	5.15867	5.47	2.26	3.7407	3.8123	4.66773	3.64126	3.32926	3.48826
Eu	2.19818	1.25627	1.60276	2.27128	1.53554	2.05295	1.40403	2			2.45892	2.75938	2.92	1.89		1.46626	1.64551	1.64478	1.64731	1.57	0.693	1.29748	1.28324	1.50358	0.957478	1.20162	1.22011
Gd	9.10391	4.49521	5.35393	6.91907	4.56542	6.48768	4.4615	5.63			8.20075	7.06454	7.31	5.05		4.60709	4.66878	4.54226	4.6362	4.53	1.9	3.69837	3.63859	4.1915	2.74324	3.29104	3.59504
Tb	1.33086	0.612126	0.749525	1.05221	0.658186	0.983028	0.63767	1.01			1.11658	0.939223	1.15	0.832		0.668051	0.667402	0.651829	0.683535	0.784	0.39	0.570333	0.575466	0.637418	0.388152	0.524732	0.550778
Dy	7.26321	3.23643	4.1077	5.9909	3.80682	5.73137	3.5999	5.34			5.84887	4.78808	5.38	4.02		3.83368	3.71925	3.62016	3.77751	3.97	2.09	3.27857	3.26309	3.57301	2.09035	3.10947	3.33423
Ho	1.35465	0.609426	0.7653	1.13822	0.713579	1.08948	0.670618	0.991			1.0974	0.867092	0.882	0.691		0.712575	0.675901	0.681108	0.744218	0.734	0.442	0.626234	0.617309	0.720553	0.408664	0.659601	0.668024
Er	3.78639	1.72414	2.07658	3.12964	1.85392	2.81551	1.69935	2.49			2.78714	2.23213	2.3	1.85		1.92647	1.83671	1.72696	1.90314	2.02	1.15	1.80497	1.82424	1.96307	1.09782	1.74334	1.9071
Tm	0.566427	0.251017	0.302464	0.428594	0.226028	0.416341	0.238998	0.405			0.388608	0.282705	0.32	0.298		0.259121	0.258601	0.250174	0.293864	0.329	0.211	0.250637	0.262238	0.279524	0.142269	0.261548	0.264775
Yb	3.47652	1.52479	1.90537	2.64613	1.45021	2.57956	1.3628	2.32			2.44	1.76864	1.82	1.76		1.73012	1.59545	1.54977	1.69048	1.87	1.34	1.59693	1.63811	1.7814	0.925389	1.60291	1.71133
Lu	0.510006	0.225087	0.275152	0.355652	0.193841	0.356192	0.169446	0.311			0.324676	0.255991	0.249	0.243		0.253844	0.241704	0.230495	0.267397	0.255	0.198	0.236827	0.230015	0.248421	0.14035	0.240592	0.246793
Hf	3.35847	4.31589	3.85302	2.04446	1.20659	2.43443	1.12162	1.32			3.10881	4.11146	4.22	2.91		3.0585	3.56819	2.90509	3.17515	3.36	1.19	2.35642	2.97079	3.14109	4.32425	2.25586	2.49649
Ta	0.600856	0.426365	0.508002	0.210911	0.13682	0.237563	0.125742	0.349			0.827352	1.15771	1.35	1.29		0.589251	0.605427	0.603828	0.576225	0.65	0.083	0.260704	0.297878	0.3307	0.721072	0.150002	0.166592
Tl	0.215443	0.624033	0.272512	0.0279129	0.0484995	0.0233383	0.0297952	0.022			0.0685857	0.302586	0.333	0.197		0.508855	0.740407	0.787166	0.48146	0.448	0.025	0.167809	0.200487	0.24794	0.318541	0.213596	0.163013
Pb	16.3399	9.14521	12.2806	2.11228	2.49396	1.66982	2.02269	3.55			6.51861	10.9259	10	10.5		15.6365	15.0757	12.9386	13.3433	11.1	3.48	9.48612	9.83842	12.9081	13.8664	6.93802	7.07994
Th	1.486	1.38835	2.64385	0.109168	0.149059	0.104072	0.0939045	0.188			1.2241	2.88642	2.8	3.6		6.87062	7.19985	7.53354	6.98919	6.05	0.273	2.32744	2.96016	4.06646	10.9957	2.17473	2.3584
U	0.574521	0.569496	0.697287	0.0351695	0.055194	0.0321294	0.0378885	0.046			0.399464	1.45889	0.775	0.605		1.57326	3.20295	2.86705	1.89949	2.11	0.087	0.871509	1.08332	1.43036	2.4939	0.588369	0.660152
